# Supplementary material for: Mechanically active integrins target lytic secretion at the immune synapse to facilitate cellular cytotoxicity
Source: PubMed Central journal article supplement (PMC9184626; doi:10.1038/s41467-022-30809-3), 2022-06-09
Supplement: 41467_2022_30809_MOESM1_ESM.pdf [file 41467_2022_30809_MOESM1_ESM.pdf]

**Supplementary information for**

**Mechanically active integrins help target lytic secretion at the immune synapse to  
facilitate cellular cytotoxicity**

Mitchell S. Wang, Yuesong Hu, Elisa E. Sanchez, Xihe Xie, Nathan H. Roy, Miguel de Jesus,  
Benjamin Y. Winer, Elizabeth A. Zale, Weiyang Jin, Chirag Sachar, Joanne H. Lee, Yeonsun  
Hong, Minsoo Kim, Lance C. Kam, Khalid Salaita, and Morgan Huse\*

\* correspondence: [husem@mskcc.org](mailto:husem@mskcc.org)

**a** Killing assay

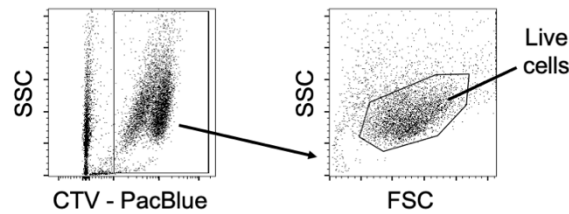

**b** Degranulation and activation assays

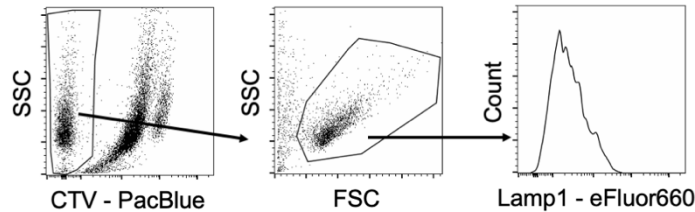

**c** Proliferation assay

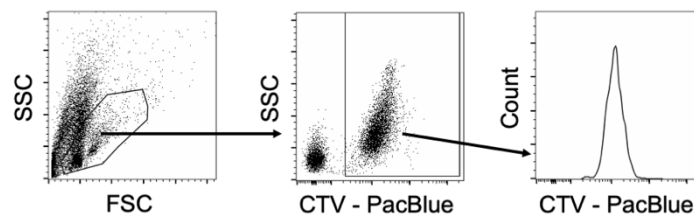

**d** Conjugate assay

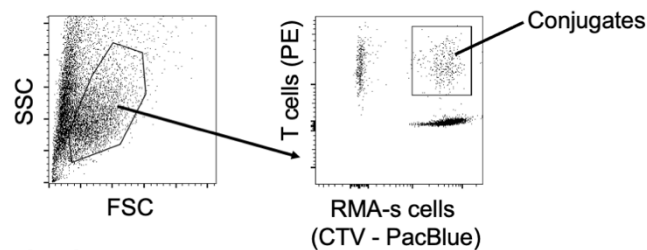

**e** Expression level assay

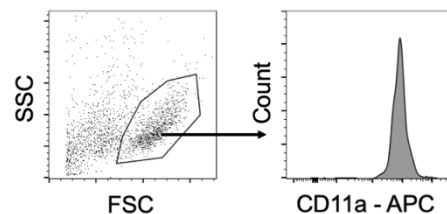

**Supplementary Figure 1. Gating strategies used for analysis.** Gating strategies used for in vitro co-culture assays. (a) Gating strategy used to measure T cell cytotoxicity against peptide-loaded RMA-s target cells (CellTrace Violet, CTV<sup>+</sup>) via forward/side-scatter. (b) Gating strategy used to measure live T cell (CTV<sup>+</sup>) degranulation (via Lamp1 exposure) and activation (via CD69 upregulation, not shown) against peptide-loaded RMA-s target cells (CTV<sup>+</sup>). (c) Gating strategy

used to measure live T cell proliferation (CTV<sup>+</sup>) via dilution of CTV dye over consecutive days. (d) Gating strategy used to measure live T cell conjugate formation against peptide-loaded RMA-s target cells (conjugates defined as post-fixation events double positive for CTV and PKH26 (visible in the PE channel). (e) Gating strategy used to measure surface expression of LFA1 on T cells stimulated with peptide and ICAM-1-coated beads (T cells identified via forward/side-scatter morphology).

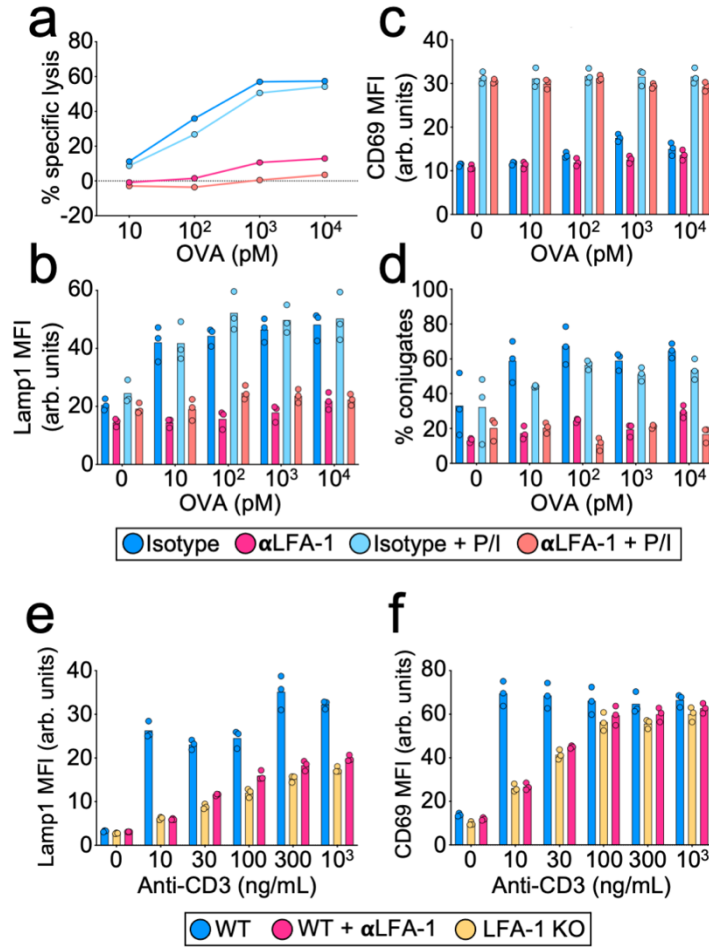

**Supplementary Figure 2. LFA-1 is required for CTL degranulation and cytotoxicity.**

Replicate experiments for Fig. 2. (a-d) OVA-loaded RMA-s target cells were mixed with OT-1 CTLs in the presence of LFA1 blocking antibody ( $\alpha$ LFA-1) or isotype control. PMA/Iono (P/I) was applied to some samples in order to drive TCR independent CTL activation. (a) Target cell killing, measured 4 h after CTL-target cell mixing (N = 2 replicate experiments). (b) Lamp1 exposure (degranulation), measured 90 min after CTL-target cell mixing (N = 4 replicate experiments). (c) CD69 expression, measured 90 min after CTL-target cell mixing (N = 2 replicate experiments). (d) Conjugate formation, measured 90 min after CTL-target cell mixing (N = 3 replicate experiments). (e-f) Polyclonal WT and LFA-1 KO CTLs were mixed with stimulatory beads coated with anti-CD3 antibody + ICAM-1 in the presence or absence of LFA1 blocking antibody ( $\alpha$ LFA-1) as indicated. (e) Lamp1 exposure, measured 90 min after CTL-bead mixing (N = 2 replicate experiments). (f) CD69 expression, measured 90 min after CTL-bead mixing (N = 2 replicate experiments). Data points in b-f represent technical triplicate measurements from an individual experiment. In a, data points represent mean values calculated from technical triplicates. Source data are provided as a Source Data file.

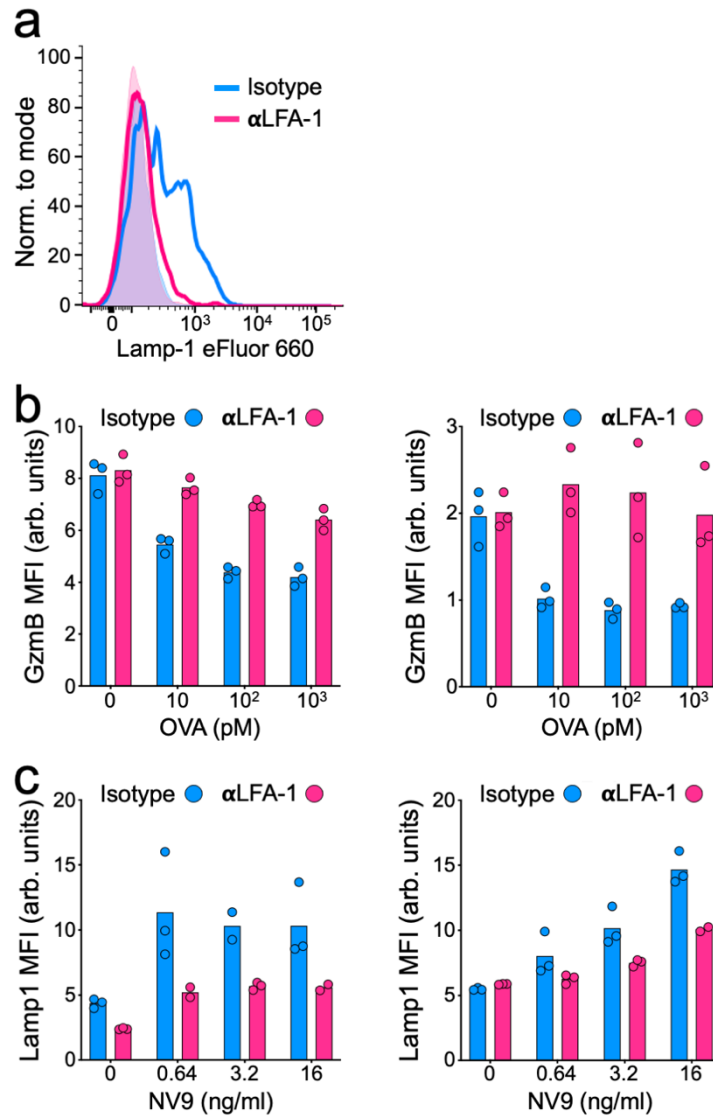

**Supplementary Figure 3. LFA-1 blockade disrupts degranulation in CTL-target cell conjugates.** (a-b) OT-1 CTLs were incubated with OVA-loaded RMA-s cells in the presence of LFA1 blocking antibody ( $\alpha$ LFA-1) or isotype control. (a) A representative FACS histogram of CTL Lamp1 staining, measured 90 min after cell mixing. (b) Staining for intracellular granzyme B (GzmB) in CTLs, performed 90 min after cell mixing. N = 2 replicate experiments, which are both shown. (c) Human OM265 CMV CTLs were mixed with HLA-A2<sup>+</sup> CD4<sup>+</sup> T cell targets in the presence of  $\alpha$ LFA-1 or isotype control. CTL Lamp1 exposure was measured after 4 h. N = 2 replicate experiments, which are both shown. Data points in b-c represent technical replicate measurements from individual experiments. Source data are provided as a Source Data file.

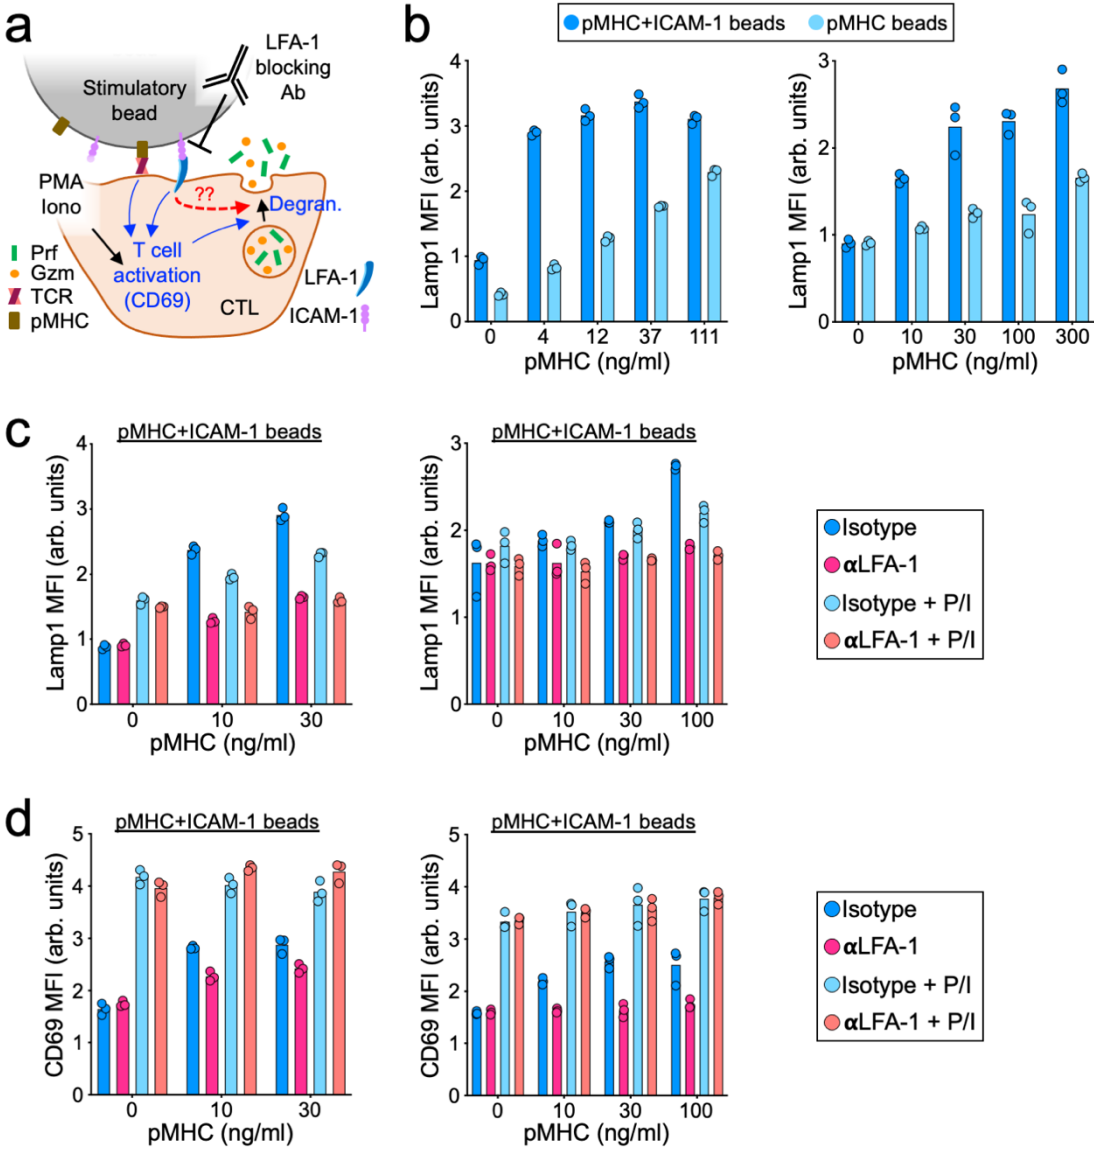

**Supplementary Figure 4. LFA-1 is required for CTL degranulation responses to stimulatory beads.** (a) Diagram schematizing CTL activation by stimulatory beads coated with pMHC (H-2K<sup>b</sup>-OVA) ± ICAM-1. (b) Degranulation responses to beads coated with pMHC ± ICAM-1, measured 90 min after CTL stimulation. N = 5 replicate experiments, two of which are shown. (c-d) Beads coated with pMHC and ICAM-1 were incubated with OT-1 CTLs in the presence or absence of PMA/Iono and treated with either αLFA-1 or isotype control. Graphs show degranulation (c) and CD69 expression (d), measured 90 min after CTL stimulation. N = 2 replicate experiments, which are both shown. Data points in b-c represent technical replicate measurements from individual experiments. Source data are provided as a Source Data file.

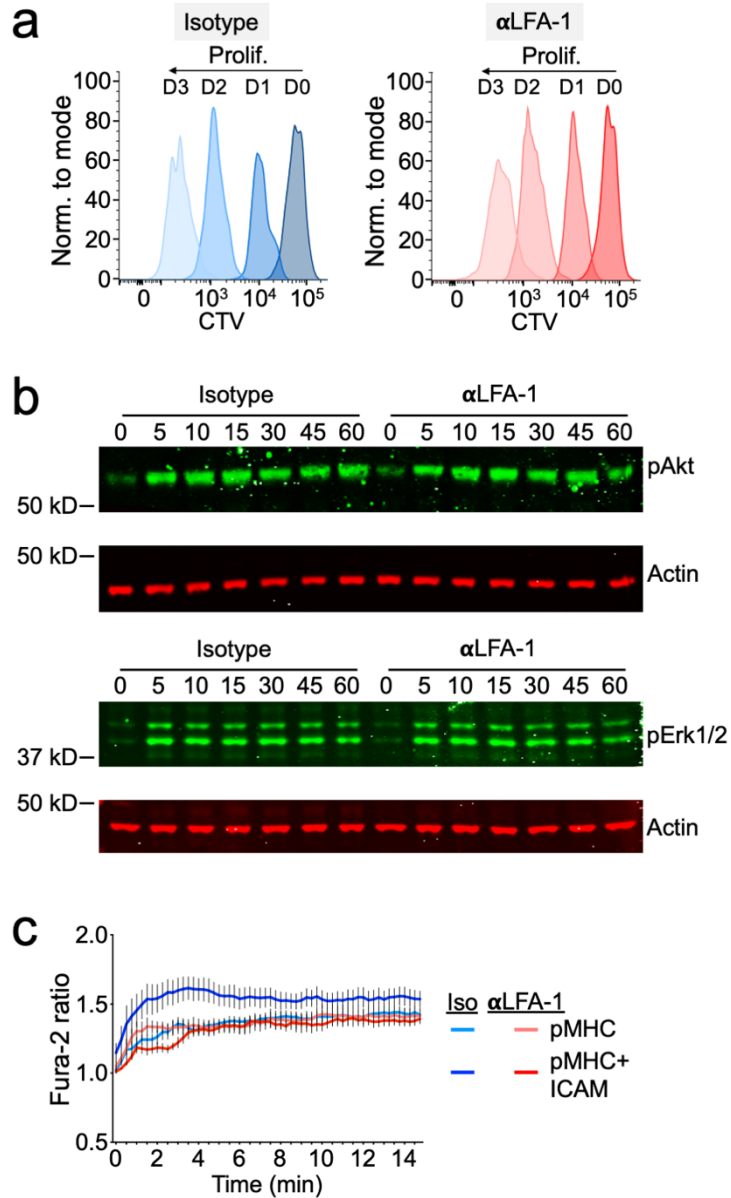

**Supplementary Figure 5. LFA-1 blockade alters only some indices of T cell activation.** (a) OT-1 CTLs were labeled with CellTrace Violet (CTV) and incubated with OVA-loaded splenocytes in the presence of  $\alpha$ LFA-1 or isotype control. CTV dilution was monitored over 3 days (D) by flow cytometry. (b) OT-1 CTLs were mixed with pMHC (H-2K<sup>b</sup>-OVA) and ICAM-1 coated beads and, at the indicated timepoints, pAKT (top) and pErk1/2 (bottom) were assessed by immunoblot, with actin serving as a loading control. Molecular weight standards are indicated to the left of each blot. (c) OT-1 CTLs were loaded with Fura-2-AM and imaged on glass surfaces coated with the indicated proteins in the presence of  $\alpha$ LFA-1 or isotype control. Graph shows the mean Fura-2 ratio of all CTLs in the imaging field, averaged over 6 positions. Error bars signify SEM. All data

are representative of at least two independent experiments. Source data are provided as a Source Data file. Uncropped immunoblots are shown in Supplementary Fig. 12.



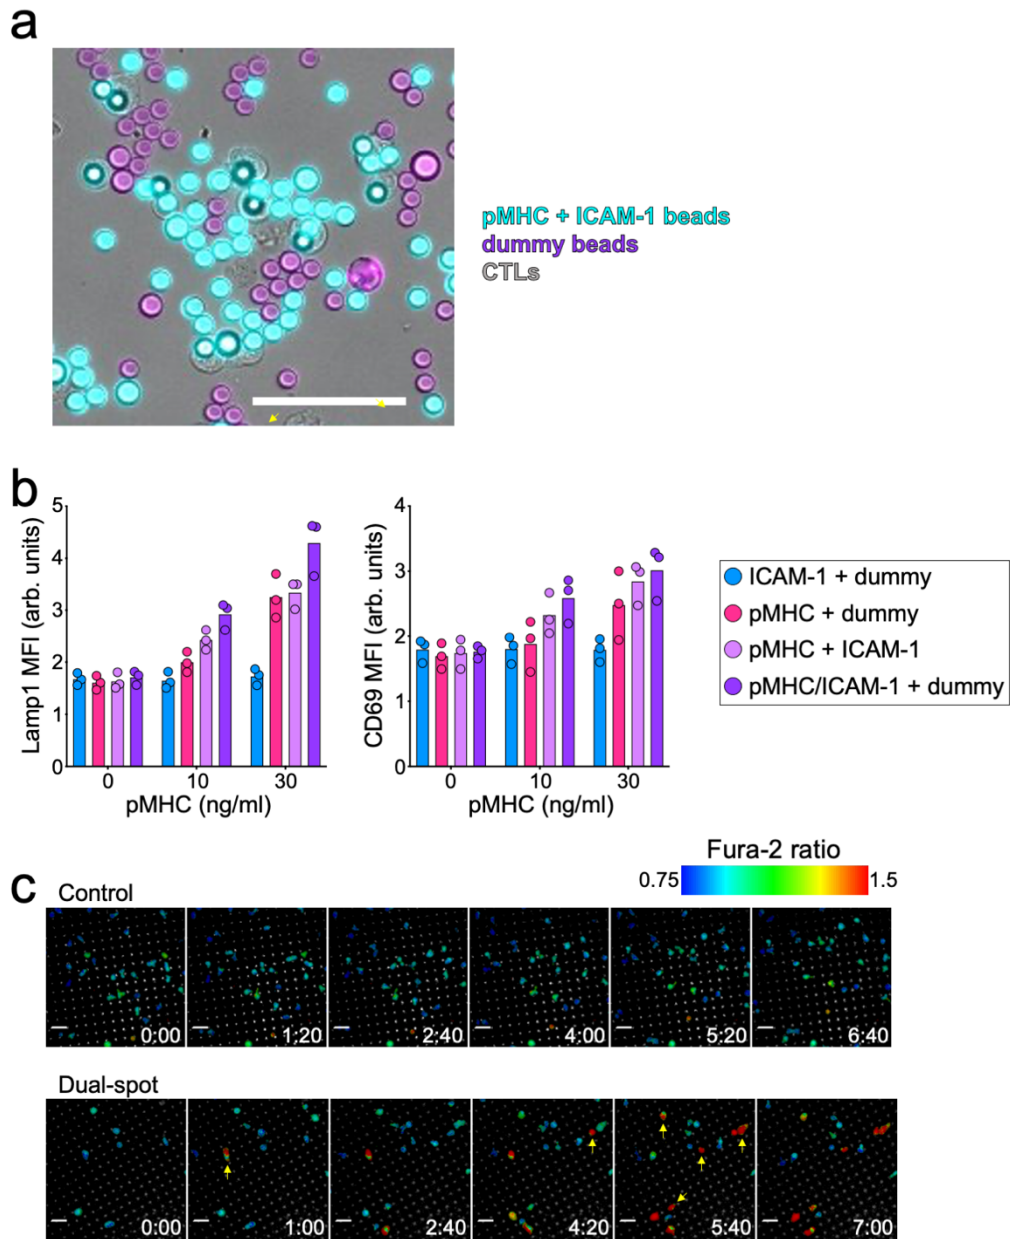

**Supplementary Figure 6. CTL stimulation with spatially segregated ligands.** (a) Representative image of OT-1 CTLs, beads coated with both pMHC and ICAM-1, and dummy beads mixed at the proportions used for Figure 3. Scale bar = 50  $\mu\text{m}$ . (b) Replicate experiments for Fig. 3b-c. OT-1 CTLs were activated by equal mixtures of stimulatory beads bearing the indicated proteins. Graphs showing CTL degranulation (left) and CD69 expression (right), measured 90 min after CTL stimulation (N = 2 replicate experiments). Data points represent technical triplicate measurements from an individual experiment. Source data are provided as a Source Data file. (c) Representative time-lapse montages of Fura-2-AM-loaded OT-1 CTLs imaged on Dual-spot and control surfaces. Yellow arrows denote the onset of  $\text{Ca}^{2+}$  flux in

individual cells. Time in M:SS is shown in the bottom right corner of each image. Scale bars = 10  $\mu\text{m}$ .

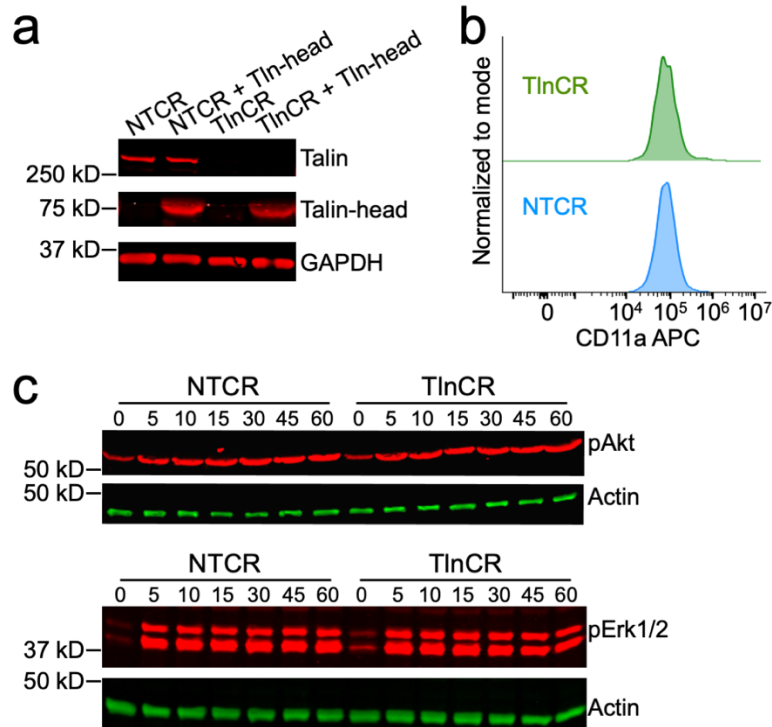

**Supplementary Figure 7. Talin depletion inhibits degranulation but not early TCR signaling.**

(a) Immunoblot analysis of full-length talin and the GFP-talin head domain in OT-1 Cas9 CTLs transduced with the indicated gRNAs  $\pm$  talin head. NTCR = nontargeting gRNA, TlnCR = talin gRNA. GAPDH served as a loading control. Molecular weight standards are indicated to the left of each blot. (b) Representative flow cytometry histograms showing LFA-1 expression (quantified using an antibody against CD11a) on NTCR and TlnCR CTLs. (c) OT-1 Cas9 CTLs transduced with the indicated gRNAs were mixed with pMHC (H-2K<sup>b</sup>-OVA) and ICAM-1 coated beads and, at the indicated timepoints, pAKT (top) and pErk1/2 (bottom) were assessed by immunoblot. Actin served as a loading control. Molecular weight standards are indicated to the left of each blot. Data are representative of at least two independent experiments. Uncropped immunoblots are shown in Supplementary Fig. 12.

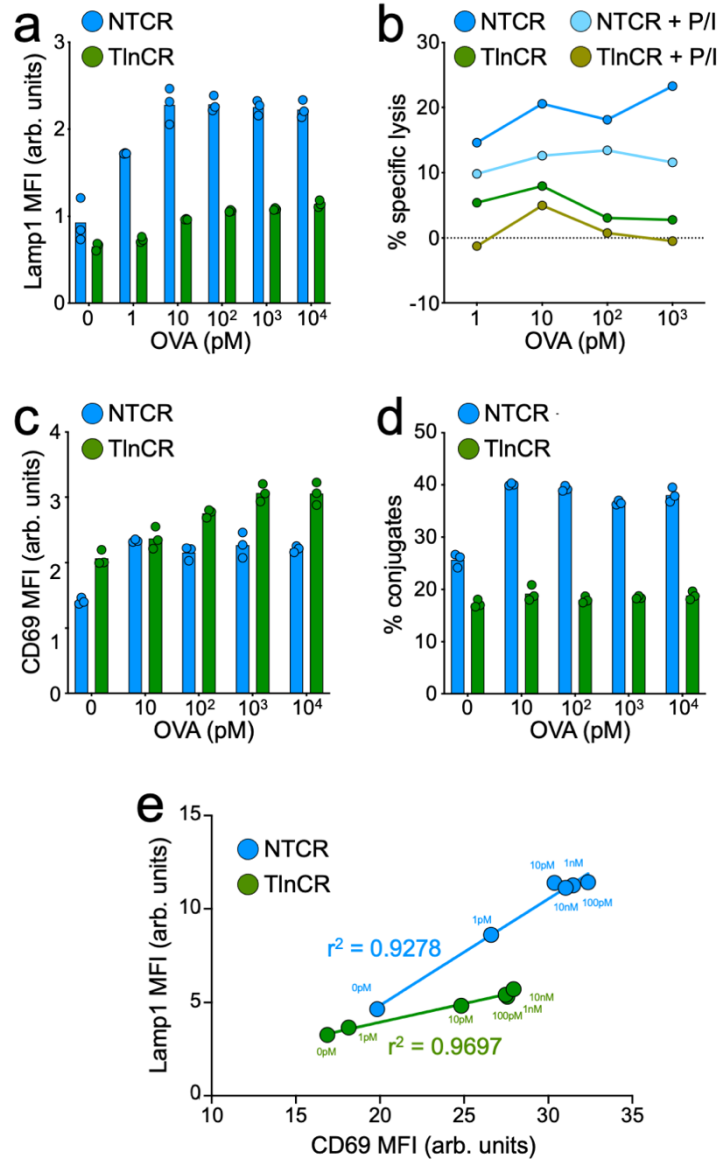

**Supplementary Figure 8. Talin is required for CTL degranulation and cytotoxicity.** (a-d) Replicate experiments for Fig. 7. OVA-loaded RMA-s target cells were mixed with OT-1 Cas9 CTLs expressing talin gRNA (TlnCR) or control nontargeting gRNA (NTCR). PMA/Iono (P/I) was applied to some samples in order to drive TCR independent CTL activation. (a) Lamp1 exposure (degranulation), measured 90 min after CTL-target cell mixing (N = 4 replicate experiments). (b) Target cell killing, measured 4 h after CTL-target cell mixing (N = 2 replicate experiments). (c) CD69 expression, measured 90 min after CTL-target cell mixing (N = 2 replicate experiments). (d) Conjugate formation, measured 90 min after CTL-target cell mixing (N = 2 replicate experiments). (e) 2-dimensional plot correlating degranulation (Lamp1) and T cell activation (CD69), taken from the same data set used to generate Fig. 7c. Regression lines and  $r^2$  values are shown. Data points in a and c-d represent technical triplicate measurements from an individual

experiment. Data points in b and e represent mean values calculated from technical triplicates. Source data are provided as a Source Data file.

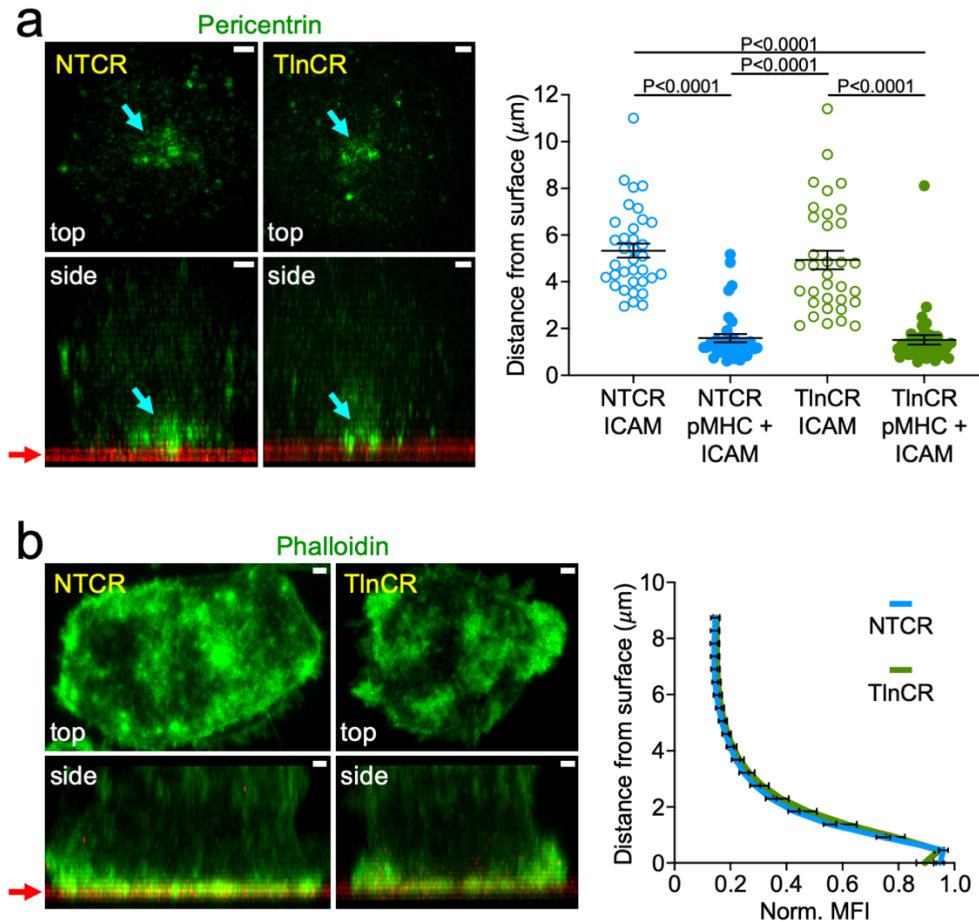

**Supplementary Figure 9. Talin is dispensable for synaptic F-actin accumulation and centrosome polarization.** OT-1 CTLs expressing the indicated gRNAs were fixed on pMHC + ICAM-1 coated coverslips and stained for pericentrin (a) or phalloidin (b). NTCR = nontargeting gRNA, TlnCR = talin gRNA. (a) Left, confocal images of representative cells, viewed from the top and side. In each set of images, the centrosome and the stimulatory surface are indicated by cyan and red arrows, respectively. Right, quantification of the distance between the centrosome and the surface.  $N \geq 34$  cells for each sample. P values were calculated by one-way ANOVA with Tukey correction. (b) Left, confocal images of representative cells, viewed from the top and side. The stimulatory surface is indicated by the red arrow in the side view images. Right, normalized mean phalloidin fluorescence intensity, graphed as a function of distance from the surface. Each curve was derived from  $\geq 19$  cells. All error bars signify SEM, and all scale bars =  $1 \mu\text{m}$ . Data are representative of at least two independent experiments. Source data are provided as a Source Data file.

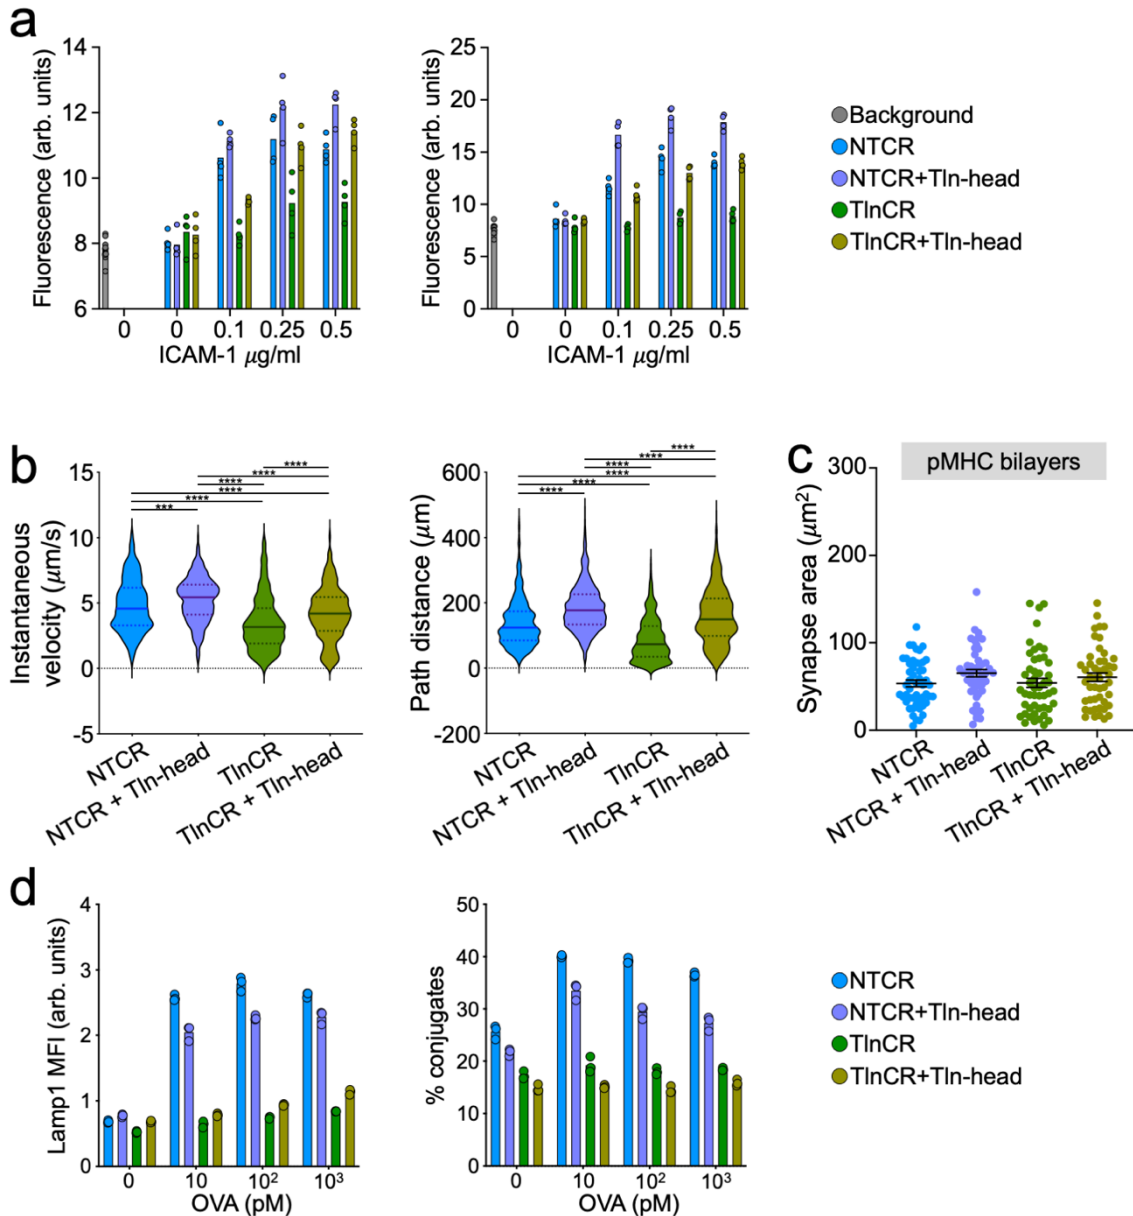

**Supplementary Figure 10. The talin head domain rescues TlnCR CTL adhesion to and migration on ICAM-1, but not degranulation and conjugate formation.** (a) OT-1 Cas9 CTLs transduced with talin gRNA (TlnCR) or control nontargeting gRNA (NTCR)  $\pm$  the talin head domain (Tln-head) were applied to coverslips coated with increasing amounts of ICAM-1. Adhesion was measured after 20 min. Data points represent technical quadruplicate measurements from an individual experiment. Eight background readings are shown in gray. N = 2 replicate experiments, which are both shown. (b) OT-1 Cas9 CTLs transduced with the indicated gRNAs  $\pm$  Tln-head were imaged on ICAM-1 coated coverslips. Instantaneous velocities (left) and total path distances (right) were derived from analysis of individual migratory tracks (N  $\geq$  414 tracks for each cell type). For each sample, solid lines denote medians and dotted lines indicate upper and lower quartiles.

Error bars signify SEM. \*\*\* and \*\*\*\* denote  $P \leq 0.001$  and  $P \leq 0.0001$ , calculated by one-way ANOVA with Tukey correction. (c) OT-1 CTLs expressing the indicated gRNAs  $\pm$  Tln-head were fixed on bilayers coated with pMHC alone and stained for phalloidin. IS area was quantified and graphed, with error bars denoting SEM.  $N \geq 48$  cells for each sample. Data in b and c are representative of two independent experiments. (d) Replicate experiments for Fig. 8f-g. OVA-loaded RMA-s target cells were mixed with OT-1 Cas9 CTLs expressing the indicated gRNAs  $\pm$  Tln-head. Left, Lamp1 exposure (degranulation), measured 90 min after CTL-target cell mixing ( $N = 2$  replicate experiments). Right, conjugate formation, measured 90 min after CTL-target cell mixing ( $N = 2$  replicate experiments). Data points represent technical triplicate measurements from an individual experiment. Source data for all graphs are provided as a Source Data file.



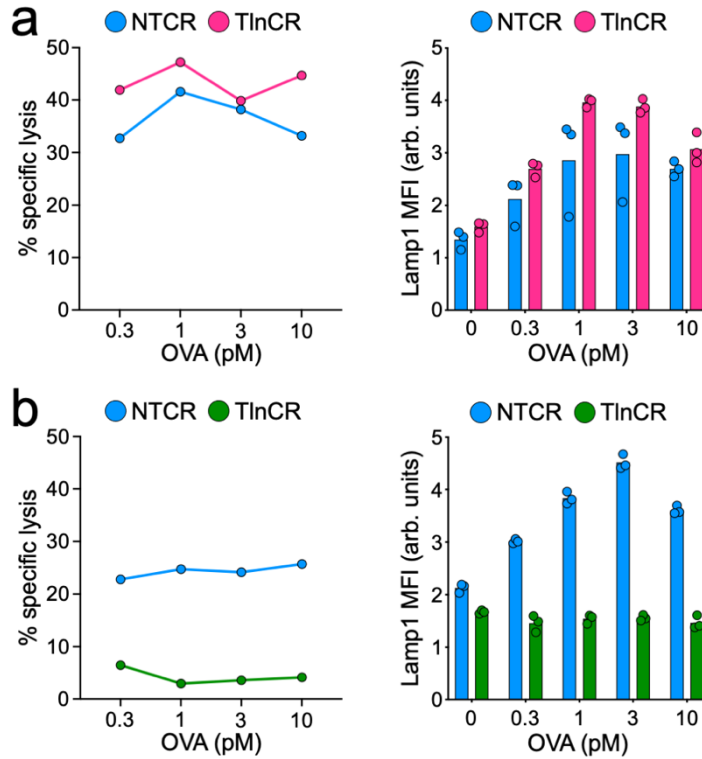

**Supplementary Figure 11. Talin, but not LFA-1, is required for CTL-mediated killing of B16F10 cells.** Replicate experiments for Fig. 9c-d. (a) OVA-loaded B16F10 target cells were mixed with OT-1 CTLs in the presence of LFA1 blocking antibody ( $\alpha$ LFA-1) or isotype control. Left, specific lysis, measured after 4 h (N = 2 replicate experiments). Right, Lamp1 exposure, measured after 90 min (N = 2 replicate experiments). (b) OVA-loaded B16F10 target cells were mixed with OT-1 Cas9 CTLs transduced with talin gRNA (TlnCR) or control nontargeting gRNA (NTCR). Left, specific lysis, measured after 4 h (N = 2 replicate experiments). Right, Lamp1 exposure, measured after 90 min (N = 2 replicate experiments). Data points in degranulation graphs represent technical triplicate measurements from an individual experiment. Data points in killing assays represent mean values calculated from technical triplicates. Source data are provided as a Source Data file.

pAKT

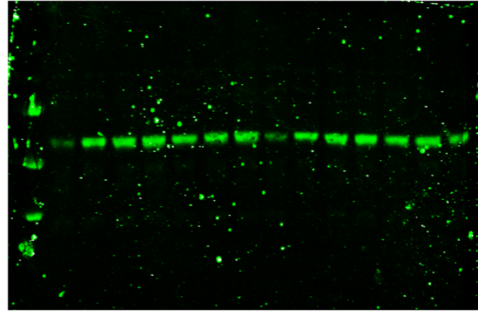

Actin

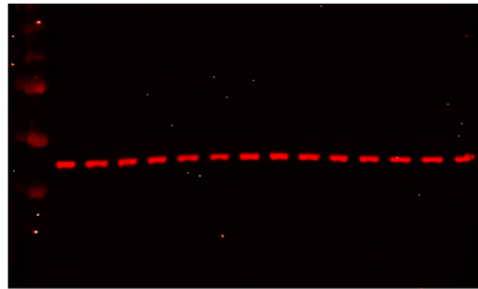

Supp. Fig. 5b

pErk1/2

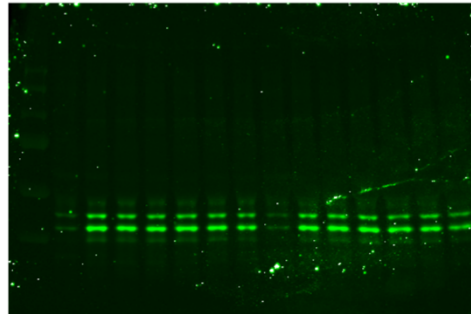

Actin

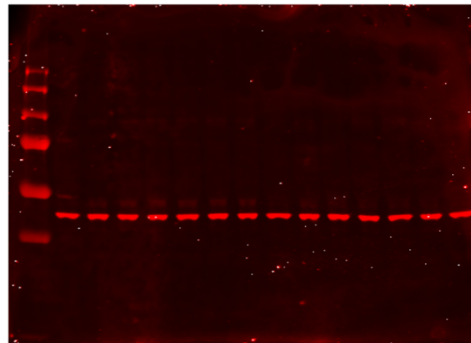

Talin

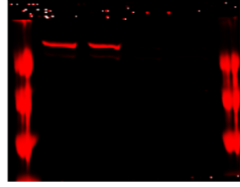

Sup. Fig. S7a

Talin head (GFP)

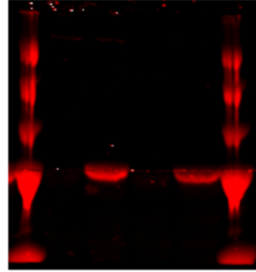

GAPDH

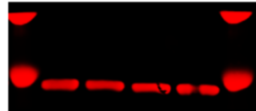

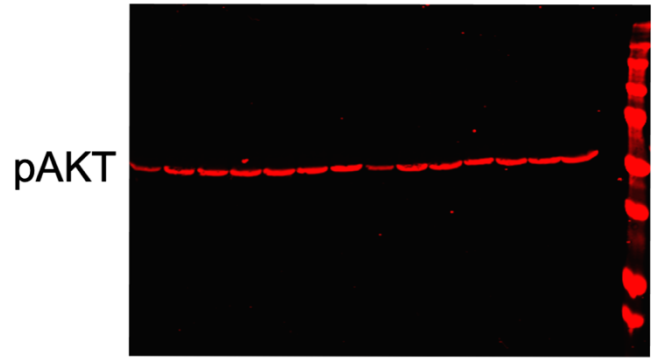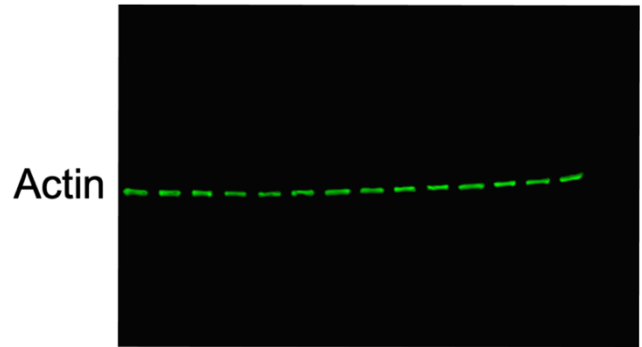

Supp. Fig. S7c

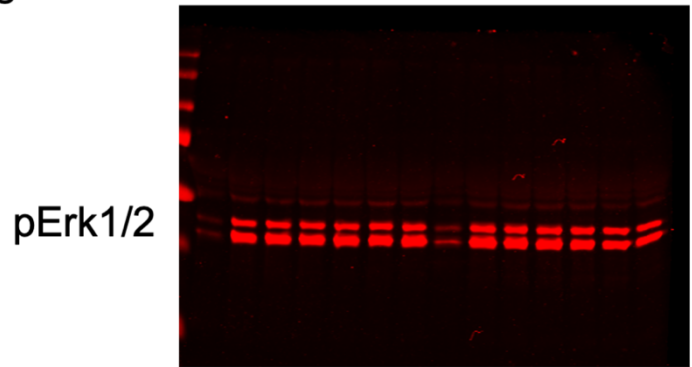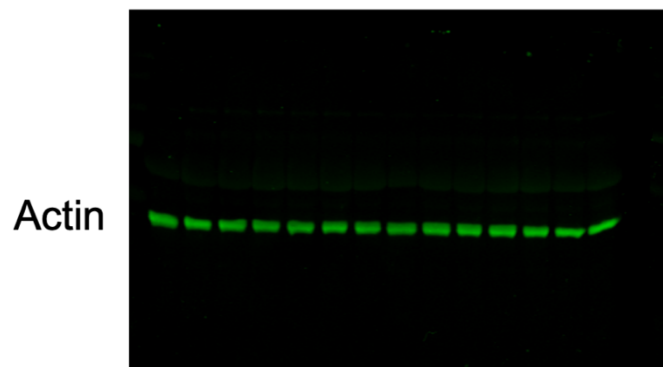

Supplementary Figure 12. Full sized images of immunoblots for Supplementary Figures 5 and 7.

**Supplementary Table 1. Antibodies used in this study.**

| Antibody                         | Source                    | Clone     | Catalog #  | Dilution | Purpose                       |
|----------------------------------|---------------------------|-----------|------------|----------|-------------------------------|
| Rat IgG2a, kappa Isotype Control | BioLegend                 | RTK2758   | 400544     | 1:50     | Control for function blocking |
| Mouse IgG2a                      | Sigma                     | UPC-10    | M5409      | 1:200    | Control for function blocking |
| Anti-CD11a                       | BioXCell                  | M17/4     | BE0006     | 1:1100   | Function blocking             |
| Anti-CD11a APC                   | BioLegend                 | M17/4     | 101119     | 1:200    | Flow cytometry                |
| Anti-CD18                        | Invitrogen                | TS1/18    | MA1810     | 1:50     | Function blocking             |
| Anti-GzmB Alexa 647              | BioLegend                 | GB11      | 515405     | 1:200    | Flow cytometry                |
| Anti-Lamp1 eFluor-660            | eBioscience               | eBio1D4B  | 50-1071-82 | 1:200    | Flow cytometry                |
| Anti-CD69 FITC                   | BioLegend                 | H1.2F3    | 104505     | 1:200    | Flow cytometry                |
| Rat IgG2b, kappa Isotype Control | BioLegend                 | RTK4530   | 400605     | 1:200    | Flow cytometry                |
| Anti-CD54 FITC                   | Invitrogen                | YN1/1.7.4 | 11-0541-82 | 1:200    | Flow cytometry                |
| Anti-CD3                         | BioLegend                 | 145-2C11  | 100301     | 1:200    | Micropatterning               |
| Anti-CD28                        | BioXCell                  | 37.51     | BE0015-1   | 1:200    | T cell activation             |
| Anti-CD3 biotin                  | eBioscience               | 145-2C11  | 13-0031-81 | 1:500    | Micropatterning               |
| Anti-CD45.2 Fab Alexa Fluor 488  | BioLegend                 | Clone 104 | 109815     | 1:200    | Traction force microscopy     |
| Anti-talin                       | Abcam                     | 8D4       | 157808     | 1:1000   | Western blot                  |
| Anti-pAKT Ser 473                | Cell Signaling Technology |           | 9271T      | 1:1000   | Western blot                  |
| Anti-pErk1/2                     | Cell Signaling Technology | D13.14.4E | 4370T      | 1:1000   | Western blot                  |
| Anti-betaActin                   | Sigma                     | AC-15     | A1978      | 1:15000  | Western blot                  |
| Anti-pericentrin                 | Abcam                     |           | ab4448     | 1:500    | Immunocytochemistry           |
| Anti-GAPDH                       | Cell Signaling Technology | D16H11    | 5174       | 1:15000  | Western blot                  |
| Anti-CD4 BV786                   | BD Biosciences            | RPA-T4    | 740962     | 1:200    | Flow cytometry                |
| Anti-CD8 BV605                   | BioLegend                 | RPA-T8    | 301040     | 1:200    | Flow cytometry                |
| Anti-GFP                         | Invitrogen                |           | A11122     | 1:2000   | Western blot                  |
